# Supplementary material for: Genome-Wide Identification of Genes Essential for the Survival of Streptococcus pneumoniae in Human Saliva
Source: PLoS One. 2014 Feb 25;9(2):e89541. doi: 10.1371/journal.pone.0089541 (PMC3934895; doi:10.1371/journal.pone.0089541)
Supplement: Table S1 — Genes of S. pneumoniae of which transposon mutants showed attenuated or enhanced survival and/or growth in human saliva, categorized by functional class. (XLSX) [file pone.0089541.s001.xlsx]

## Sheet: Table S1 Verhagen et al
						Start vs 37°C+CO2*		Start vs RT*
	Locus tag	TIGR4 locus	Gene	Product	Functional class	log2FC	adj.P.Val	log2FC	adj.P.Val	Weblinks to relevant publications
Genes of which transposon mutants showed attenuated survival and/or growth in saliva
	SP195_0803	SP_0788	metG	methionyl-tRNA synthetase	Amino acid metabolism	-1.28892	0.00174013
	SP195_0991	SP_1024	glyA	serine hydroxymethyltransferase	Amino acid metabolism	-1.28631	0.00862111	-1.73494	0.0348174
	SP195_1267	SP_1306		NAD(p)-specific glutamate dehydrogenase (nad(p)h-dependent glutamate dehydrogenase)	Amino acid metabolism	-1.19486	0.01886
	SP195_1309	SP_1370	aroK	shikimate kinase	Amino acid metabolism	-1.00516	0.0267026			www.ncbi.nlm.nih.gov/pubmed/16921527
	SP195_1313	SP_1374	aroC	chorismate synthase	Amino acid metabolism	-1.63873	2.95253e-05			www.ncbi.nlm.nih.gov/pubmed/16921527
	SP195_1314	SP_1375	aroB	3-dehydroquinate synthase	Amino acid metabolism	-0.990279	0.0305886			www.ncbi.nlm.nih.gov/pubmed/16921527
	SP195_1315	SP_1376	aroE	shikimate 5-dehydrogenase	Amino acid metabolism	-1.14078	0.00361446			www.ncbi.nlm.nih.gov/pubmed/16921527
	SP195_1316	SP_1377	aroD	3-dehydroquinate dehydratase, type I	Amino acid metabolism	-1.62513	0.000132437			www.ncbi.nlm.nih.gov/pubmed/16921527
	SP195_1381	SP_1445		GMP synthase [glutamine-hydrolyzing] (Glutamineamidotransferase) (GMP synthetase)	Amino acid metabolism	-2.29453	6.55965e-08	-2.51248	6.7199e-06
	SP195_1403	SP_1467		SNO glutamine amidotransferase family superfamily	Amino acid metabolism	-1.9404	4.31789e-05
	SP195_1477	SP_1544		aspartate aminotransferase (transaminase a) (aspat)	Amino acid metabolism	-2.60117	7.17138e-12
	SP195_0336	SP_0828	rpiA	ribose 5-phosphate isomerase A	Carbohydrate metabolism	-7.86391	3.2892e-40	-1.88687	7.16572e-05
	SP195_0378	SP_0330	regR	sugar binding transcriptional regulator RegR	Carbohydrate metabolism	-1.23013	0.00264594
	SP195_1058	SP_1068	ppc	phosphoenolpyruvate carboxylase	Carbohydrate metabolism	-5.10239	6.95267e-32	-1.02981	NS (p=0.11)
	SP195_1688	SP_1724		sucrose-6-phosphate hydrolase (Sucrase) (Invertase)	Carbohydrate metabolism	-1.65961	0.01371	-0.978962	NS (p=0.24)
	SP195_1832	SP_1883	treC	alpha,alpha-phosphotrehalase	Carbohydrate metabolism	-1.18886	0.00746234
	SP195_1983	SP_2030	tkt	transketolase	Carbohydrate metabolism	-10.9778	2.05882e-91	-3.48614	3.16015e-06
	SP195_1213	SP_1247	smc	chromosome segregation protein SMC	Cell division	-1.20191	0.00119404	-1.01754	NS (p=0.06)
	SP195_1824	SP_1875	scpB	segregation and condensation protein B	Cell division	-1.13347	0.00640501	-1.09019	0.0298895
	SP195_1825	SP_1876	scpA	segregation and condensation protein A	Cell division	-1.27556	0.00102958	-1.11715	0.0459712
	SP195_0075	SP_0037	plsX	fatty acid/phospholipid synthesis protein PlsX	Cell envelope biosynthesis	-1.58845	NS (p=0.08)	-8.55683	5.25556e-37	www.ncbi.nlm.nih.gov/pubmed/16949372
	SP195_0143	SP_0107		LysM domain protein	Cell envelope biosynthesis	-1.03028	0.0252202			http://europepmc.org/abstract/MED/1352512
	SP195_0215	SP_0199		cardiolipin synthase	Cell envelope biosynthesis	-1.13788	0.00527243			www.ncbi.nlm.nih.gov/pmc/articles/PMC3147675/
	SP195_0279	SP_0266	glmS	glutamine-fructose-6-phosphate transaminase (isomerizing)	Cell envelope biosynthesis	-1.49918	0.000125686	-1.14144	NS (p=0.12)
	SP195_0399	SP_0349	cpsD	tyrosine-protein kinase CpsD	Cell envelope biosynthesis	-3.37245	8.35318e-14	-2.4016	0.000466366
	SP195_0400		cpsE	galactosyl transferase CpsE	Cell envelope biosynthesis	-1.46969	0.0141191	-1.18414	NS (p=0.09)
	SP195_0401			UDP-N-acetyl-D-mannosamine transferase	Cell envelope biosynthesis	-3.22294	4.82906e-19	-3.18051	1.81891e-10
	SP195_0417	SP_0369	pbp1A	penicillin-binding protein 1a	Cell envelope biosynthesis	-1.06455	0.00359616
	SP195_0456	SP_0416		transcriptional regulator	Cell envelope biosynthesis	-1.92598	0.00499299	-2.84844	4.5253e-06	www.ncbi.nlm.nih.gov/pubmed/23275247
	SP195_0495	SP_0457		undecaprenyl-diphosphatase (Undecaprenyl pyrophosphatephosphatase)	Cell envelope biosynthesis	-3.03168	5.56559e-05	-1.57296	NS (p=0.09)
	SP195_0645	SP_0615	murM	serine/alanine-adding enzyme MurM	Cell envelope biosynthesis	-0.873501	0.0468498	-1.37645	0.00450033	www.ncbi.nlm.nih.gov/pubmed/11822770
	SP195_0646	SP_0616	murN	alanine-adding enzyme MurN	Cell envelope biosynthesis	-1.56577	6.66628e-05	-3.04871	8.44171e-08	www.ncbi.nlm.nih.gov/pubmed/11822770
	SP195_0705	SP_0676		regulatory function on capsule expression	Cell envelope biosynthesis	-1.07846	0.00698323
	SP195_0838	SP_0872	dacA	D-alanyl-D-alanine carboxypeptidase	Cell envelope biosynthesis			-2.51266	3.40642e-08
	SP195_1349	SP_1412	lgt	prolipoprotein diacylglyceryl transferase	Cell envelope biosynthesis	-2.41557	6.2263e-14	-1.91343	1.72478e-05	http://jb.asm.org/content/194/9/2129.short
	SP195_1415	SP_1479	pgdA	peptidoglycan GlcNAc deacetylase	Cell envelope biosynthesis	-1.27885	0.000749081	-2.88309	1.68783e-06	www.ncbi.nlm.nih.gov/pubmed/10781617
	SP195_1847	SP_1893		O-antigen polymerase family	Cell envelope biosynthesis	-5.69497	1.05363e-23	-5.81398	1.78226e-30
	SP195_1964	SP_2010	pbp2A	penicillin-binding protein 2A	Cell envelope biosynthesis	-2.49991	1.62847e-12	-1.50503	0.00106671
	SP195_2010	SP_2056	nagA	N-acetylglucosamine-6-phosphate deacetylase	Cell envelope biosynthesis	-1.84982	4.06048e-05
	SP195_2011	SP_2057	oatA	peptidoglycan O-acetyltransferase	Cell envelope biosynthesis	-1.00892	0.0134101	-1.40827	0.0275428	http://europepmc.org/abstract/MED/16861647
	SP195_2231	SP_0010		beta-lactamase class A	Cell envelope biosynthesis	-2.22294	2.36875e-06	-2.64578	1.21895e-07
	SP195_0896	SP_0928	lspA	signal peptidase II	Cell envelope biosynthesis	-2.78745	2.90042e-11	-1.69289	0.000636405
	SP195_1105	SP_1112		degV family protein	Cell envelope biosynthesis	-3.61878	1.52218e-08	-3.02259	7.42115e-13	www.ncbi.nlm.nih.gov/pubmed/12577257?dopt=Abstract
	SP195_0911	SP_0944	pyrH	UMP kinase	Nucleotide metabolism	-1.18958	0.0128177
	SP195_1243	SP_1278	pyrR	bifunctional protein PyrR	Nucleotide metabolism	-1.81162	3.78201e-05	-1.34832	0.0437983
	SP195_1570	SP_1588		probable pyridine nucleotide-disulfide oxidoreductase YkgC	Nucleotide metabolism	-1.38644	4.43661e-05
	SP195_2233	SP_0012	hptS	hypoxanthine phosphoribosyltransferase	Nucleotide metabolism	-2.37312	1.06823e-09	-1.89438	0.00403192
	SP195_A0021	SP_0189	spx	regulatory protein spx	Stress response	-3.24624	3.38567e-13	-3.67193	1.15203e-07	http://www.ncbi.nlm.nih.gov/pubmed/15659166
	SP195_0358	SP_0800		conserved hypothetical protein	Stress response (Putative promoter area of ciaH)			-2.19307	3.84682e-07
	SP195_0359	SP_0799	ciaH	sensor protein CiaH	Stress response	-3.16748	8.44614e-07	-1.80762	0.00232477
	SP195_0442	SP_0400	tig	trigger factor	Stress response	-1.44773	4.33868e-05			www.ncbi.nlm.nih.gov/pubmed/21093574; www.ncbi.nlm.nih.gov/pubmed/10458167
	SP195_0480	SP_0442		alkaline shock protein	Stress response	-1.68473	0.00159684			http://europepmc.org/abstract/MED/7864904
	SP195_0748	SP_0730	spxB	pyruvate oxidase	Stress response	-1.76398	6.5354e-07			www.ncbi.nlm.nih.gov/pubmed/14617646
	SP195_0780	SP_0766		superoxide dismutase [Mn] (General stress protein 24)(GSP24)	Stress response	-2.51798	6.33952e-10	-3.67848	5.02317e-05	www.ncbi.nlm.nih.gov/pubmed/7917419
	SP195_0799	SP_0784	gor	glutathione-disulfide reductase	Stress response	-6.73815	2.32066e-61	-4.24809	2.38514e-17
	SP195_0943	SP_0975	rnr	ribonuclease R	Stress response			-1.4259	0.00210777	http://www.biomedcentral.com/1471-2180/12/268
	SP195_0944	SP_0976	smpB	SsrA-binding protein	Stress response	-1.52442	0.000425483	-1.74093	0.00768095	http://jac.oxfordjournals.org/content/early/2013/06/27/jac.dkt231.full; http://www.plosone.org/article/info:doi/10.1371/journal.pone.0003810
	SP195_1299	SP_1362	mecA	adapter protein MecA	Stress response	-1.8244	0.00290019	-1.69079	0.0311331	http://www.pnas.org/content/100/5/2306.full.pdf
	SP195_1496	SP_1563		thioredoxin reductase	Stress response	-1.29925	0.00020994	-1.34357	0.0140237
	SP195_1556	SP_1570		conserved hypothetical protein	Stress response			-1.99477	0.00604071
	SP195_2150	SP_2188	hslO	chaperonin HslO	Stress response	-1.1891	0.00139629			www.ncbi.nlm.nih.gov/pubmed/22296329
	SP195_2157	SP_2194	clpB	ClpB protein	Stress response	-1.46925	4.69361e-06			www.ncbi.nlm.nih.gov/pubmed/8772382‎; www.ncbi.nlm.nih.gov/pubmed/16563798; www.pnas.org/content/96/24/13732
	SP195_2158	SP_2195	ctsR	transcriptional regulator CtsR	Stress response	-0.928025	0.0206849	-1.62012	0.000449073
	SP195_2227	SP_0006	mfd	transcription-repair coupling factor	Stress response			-1.60242	0.000527134	www.ncbi.nlm.nih.gov/pubmed/22427630
	SP195_0171	SP_0120	gidA	tRNA uridine 5-carboxymethylaminomethyl modification enzyme GidA	Translation & Transcription	-2.10818	4.95478e-09	-1.48127	0.00306685
	SP195_0710	SP_0681	typA	GTP-binding protein TypA/BipA	Translation & Transcription	-1.38499	0.00113593	-2.88296	4.75364e-07
	SP195_0897	SP_0929	rluD	ribosomal large subunit pseudouridine synthase D	Translation & Transcription			-1.21716	0.00998568
	SP195_0929	SP_0960	rpmI	ribosomal protein L35	Translation & Transcription			-1.55779	0.0298895
	SP195_0984	SP_1016	trmE	tRNA modification GTPase TrmE	Translation & Transcription	-2.08304	5.73137e-09	-2.19041	1.63198e-06
	SP195_1904	SP_1944	tsaE	tRNA threonylcarbamoyl adenosine modification protein TsaE	Translation & Transcription	-1.47199	0.00174013
	SP195_2151	SP_2189		tRNA-dihydrouridine synthase B	Translation & Transcription			-1.33122	0.00513428
	SP195_2225	SP_0004	ychF	GTP-binding protein YchF	Translation & Transcription	-1.49075	0.000600769
	SP195_2228	SP_0007		S4 domain protein	Translation & Transcription	-1.39988	0.00486203	-2.08247	0.000142084
	SP195_0117	SP_0079		potassium uptake protein, Trk family	Transport	-2.39872	1.0391e-08	-1.22057	NS (p=0.1)
	SP195_0199	SP_0148		ABC transporter substrate-binding protein - amino acid transport	Transport	-4.9473	1.41645e-24	-2.21282	2.00158e-06
	SP195_0200	SP_0149		lipoprotein	Transport	-0.981056	0.0183238
	SP195_0971	SP_1002	adcA	zinc-binding lipoprotein AdcA	Transport	-1.03605	0.0404871
	SP195_1059	SP_1069		ABC transporter substrate binding protein	Transport	-1.19113	0.00212742	-1.80552	6.39612e-05
	SP195_1060	SP_1070		ABC-type transporter	Transport	-1.53702	4.37325e-06	-1.92633	1.58754e-05
	SP195_1061	SP_1071		ABC transporter, ATP-binding protein	Transport	-1.30746	0.000287182	-1.68761	0.000361038
	SP195_1333	SP_1396	pstB	phosphate ABC transporter, ATP-binding protein	Transport	-1.0383	0.00456339			www.ncbi.nlm.nih.gov/pubmed/9973337
	SP195_1334	SP_1397	pstB	phosphate ABC transporter, ATP-binding protein	Transport	-1.08051	0.00286492			www.ncbi.nlm.nih.gov/pubmed/9973337
	SP195_1335	SP_1398	pstA	phosphate ABC transporter, permease protein PstA	Transport	-1.70226	5.02014e-06	-0.971555	NS (p=0.12)	www.ncbi.nlm.nih.gov/pubmed/9973337
	SP195_1336	SP_1399	pstC	phosphate ABC transporter, permease protein PstC	Transport	-1.25713	0.00270147			www.ncbi.nlm.nih.gov/pubmed/9973337
	SP195_1337	SP_1400	pstS	phosphate-binding protein PstS 1 (PBP 1)	Transport	-1.35091	0.000156394			www.ncbi.nlm.nih.gov/pubmed/9973337
	SP195_1338	SP_1401		conserved hypothetical protein	Transport (putative promoter of pstS)	-1.68426	0.00507472	-1.74119	0.00476146
	SP195_1437	SP_1505		transport protein	Transport	-2.77778	2.7379e-08	-2.38015	0.000915048
	SP195_1552	SP_1566		P-loop ATPase family protein	Transport			-2.68359	5.04132e-09
	SP195_1577	SP_1597		conserved hypothetical protein	Transport	-1.32967	0.00170737
	SP195_1615	SP_1649	psaC	manganese transport system membrane protein MntB	Transport	-4.60455	2.83803e-17	-5.25105	4.70057e-16	www.ncbi.nlm.nih.gov/pubmed/20601473
	SP195_1616	SP_1650	psaA	manganese ABC transporter substrate-binding lipoprotein (Adhesin B) (Saliva-binding protein)	Transport	-7.17199	7.25287e-29	-5.30596	4.25164e-16	www.ncbi.nlm.nih.gov/pubmed/20601473
	SP195_1842	SP_1887	amiF	oligopeptide transport ATP-binding protein AmiF	Transport	-3.00377	1.37451e-12			www.ncbi.nlm.nih.gov/pubmed/8051706; www.ncbi.nlm.nih.gov/pubmed/15213133
	SP195_1843	SP_1888	amiE	oligopeptide transport ATP-binding protein OppD	Transport	-2.77667	1.19275e-11			www.ncbi.nlm.nih.gov/pubmed/8051706; www.ncbi.nlm.nih.gov/pubmed/15213133
	SP195_1844	SP_1889	amiD	oligopeptide transport system permease protein AmiD	Transport	-3.16291	2.96515e-14			www.ncbi.nlm.nih.gov/pubmed/8051706; www.ncbi.nlm.nih.gov/pubmed/15213133
	SP195_1845	SP_1890	amiC	oligopeptide transport system permease protein AmiC	Transport	-2.96701	4.78393e-13			www.ncbi.nlm.nih.gov/pubmed/8051706; www.ncbi.nlm.nih.gov/pubmed/15213133
	SP195_1846	SP_1891	amiA	AmiA protein	Transport	-0.963347	0.0102059			www.ncbi.nlm.nih.gov/pubmed/8051706; www.ncbi.nlm.nih.gov/pubmed/15213133
	SP195_2181	SP_2219		ABC transporter permease protein	Transport	-1.42484	0.0045525	-1.30143	0.0243411
	SP195_2182	SP_2220	cbiO1	cobalt import ATP-binding protein CbiO 1	Transport	-1.89355	6.5354e-07
	SP195_2183	SP_2221	cbiO2	cobalt import ATP-binding protein CbiO 2	Transport	-1.25882	0.00862111	-0.997259	NS (p=0.07)
	SP195_2192	SP_2230		ATPase component of ABC transporters with duplicated ATPase domains	Transport			-1.5246	0.000361038
	SP195_2193	SP_2231		ABC transporter, permease component	Transport			-1.16891	0.019107
	SP195_1404	SP_1468		pyridoxine biosynthesis protein	Vitamin biosynthesis	-1.98575	5.29874e-08
	SP195_1934	SP_1982		thiamine pyrophosphokinase	Vitamin biosynthesis			-1.14394	0.0353466
	SP195_0211	SP_0160		conserved hypothetical protein	ZZ -Other	-1.09796	0.01351
	SP195_0422	SP_0374		conserved hypothetical protein	ZZ -Other			-1.07322	0.0243411
	SP195_0711	SP_0682		conserved hypothetical protein	ZZ -Other			-2.02151	8.28774e-05
	SP195_0844	SP_0879		conserved hypothetical protein	ZZ -Other	-1.87317	0.0254186	-2.00684	0.0381247
	SP195_0958	SP_0989		adp-ribose pyrophosphatase (adp-ribose diphosphatase)	ZZ -Other			-1.64002	0.000513708
	SP195_1098	SP_1106		conserved hypothetical protein	ZZ -Other	-2.38617	1.12561e-07	-3.07234	3.65653e-09
	SP195_1119	SP_1127		conserved hypothetical protein	ZZ -Other	-1.05372	0.0275337
	SP195_1179	SP_1210		bacteriocin immunity protein	ZZ -Other	-1.14529	0.0031971
	SP195_1263	SP_1298		DHH subfamily 1 protein	ZZ -Other	-1.66412	7.538e-05
	SP195_1330	SP_1393		transcriptional regulator GntR family	ZZ -Other	-3.67547	1.10927e-14	-1.40942	0.00235703
	SP195_1401	SP_1465		conserved hypothetical protein	ZZ -Other	-1.06608	0.0135182
	SP195_1402	SP_1466		hemolysin-3 (Hemolysin III) (Hly-III)	ZZ -Other	-4.92597	5.96355e-15	-8.88374	2.96573e-28
	SP195_1417	SP_1482		oxidoreductase	ZZ -Other			-2.48542	0.00359993
	SP195_1418	SP_1483		dead rna helicase	ZZ -Other			-2.4368	0.000117201
	SP195_1438	SP_1506		3-carboxymuconate cyclase	ZZ -Other	-6.35124	2.86916e-21	-1.987	0.00316194
	SP195_1492	SP_1558		conserved hypothetical protein	ZZ -Other	-1.04152	0.0341391	-1.41224	0.0291645
	SP195_1505			hypothetical protein	ZZ -Other			-1.98382	6.39612e-05
	SP195_1506			hypothetical protein	ZZ -Other			-1.74661	0.0121215
	SP195_1698	SP_1733	stkP	protein phosphatase PrpC	ZZ -Other	-7.12341	2.62475e-49	-4.13266	1.19765e-10
	SP195_1704	SP_1739		conserved hypothetical protein	ZZ -Other	-4.45505	7.09814e-20	-4.6224	1.01862e-16
	SP195_1785			conserved hypothetical protein	ZZ -Other	-1.33219	0.000595458	-1.11978	0.0251151
	SP195_1828	SP_1879		phosphodiesterase, family	ZZ -Other	-1.1159	0.0120824	-2.19263	0.000158878
	SP195_1882	SP_1922		conserved hypothetical protein	ZZ -Other	-1.71712	1.15284e-06
	SP195_1932	SP_1980		3'-5' exoribonuclease YhaM	ZZ -Other	-1.09913	0.0059238
	SP195_1973	SP_2020		transcriptional regulator, GntR family	ZZ -Other	-1.01265	0.0344761
	SP195_1979			conserved hypothetical protein	ZZ -Other	-1.38915	0.00302834	-1.33372	0.0359141
	SP195_1980	SP_2027		morn motif family protein	ZZ -Other	-1.75713	2.38609e-06	-1.59802	0.0126339
	SP195_1981	SP_2028		phosphotyrosine protein phosphatase	ZZ -Other	-1.34188	0.00277412
	SP195_2072	SP_2115		conserved hypothetical protein	ZZ -Other			-1.18353	0.021975
	SP195_2185	SP_2223		conserved hypothetical protein	ZZ -Other	-1.03585	0.0309728	-1.44198	0.00452532
	SP195_2186	SP_2224		peptidase, M16 family	ZZ -Other	-1.38095	0.00104041	-1.06661	0.0480301
	SP195_2187	SP_2225		peptidase, M16 family	ZZ -Other	-1.24776	0.00990854	-1.50873	0.00143992
Genes of which transposon mutants showed enhanced survival and/or growth in saliva
	SP195_0541	SP_0502	glnA	glutamine synthetase, type I	Amino acid metabolism			1.14284	0.019107
	SP195_2147	SP_2186	glpK	glycerol kinase	Carbohydrate metabolism			1.53082	0.0494868
	SP195_0993	SP_1026		pneumococcal vaccine antigen A	Cell envelope biosynthesis	1.0887	0.00431552
	SP195_2133	SP_2173	dltD	D-alanine transfer from undecaprenol-phosphate to the poly	Cell envelope biosynthesis			1.18073	0.0218767	www.ncbi.nlm.nih.gov/pubmed/16885447
	SP195_2134	SP_2174	dltC	D-alanyl carrier protein	Cell envelope biosynthesis			1.18275	0.0464098	www.ncbi.nlm.nih.gov/pubmed/16885447
	SP195_2135	SP_2175	dltB	protein DltB	Cell envelope biosynthesis			1.29098	0.011949	www.ncbi.nlm.nih.gov/pubmed/16885447
	SP195_2136	SP_2176	dltA	D-alanine-activating enzyme	Cell envelope biosynthesis			1.33191	0.00614964	www.ncbi.nlm.nih.gov/pubmed/16885447; www.ncbi.nlm.nih.gov/pubmed/17217430
	SP195_2137	SP_2177		conserved hypothetical protein	Cell envelope biosynthesis			1.31406	0.0358298
	SP195_1790	SP_1839		ABC transporter, ATP-binding protein	Transport			1.53768	0.0121462
	SP195_1791	SP_1840		ABC transporter, ATP-binding protein	Transport			1.2503	0.0357155
	SP195_0341	SP_0822		conserved hypothetical protein	Stress response			1.48594	0.00470844
	SP195_1581			conserved hypothetical protein	ZZ -Other	1.75368	0.000171733	2.08381	0.011949
*For genes that were only selected in 1 of the 2 challenge conditions, the p-values and fold-changes of the respective gene in the other challenge condition were only displayed (in red) if either p<0.05 or log fold-change ≤(-)1.0
